# Supplementary material for: Structural and Functional Insights into Ubl Domain- Mediated Regulation of SARS-CoV-2 PLpro
Source: Research Square preprint supplement (doi:10.21203/rs.3.rs-6938209/v1), 2025-06-26
Supplement: Supplementary file 1 [file b0e2efc4c3129e102770b8aa.docx]

Structural and Functional Insights into Ubl Domain-Mediated Regulation of SARS-CoV-2 PLpro

Rimanshee Arya,a, b, Janani Ganesh,a, b, Vishal Prashar,a,b* and Mukesh Kumara, b*

a Protein Crystallography Section, Bhabha Atomic Research Centre, Mumbai, India-400085.

b Homi Bhabha National Institute, Anushakti Nagar, Mumbai, India-400094.

(*) corresponding author: [vishalp@barc.gov.in](mailto:vishalp@barc.gov.in)**,** [mukeshk@barc.gov.in](mailto:mukeshk@barc.gov.in)

**Supplementary information**

| 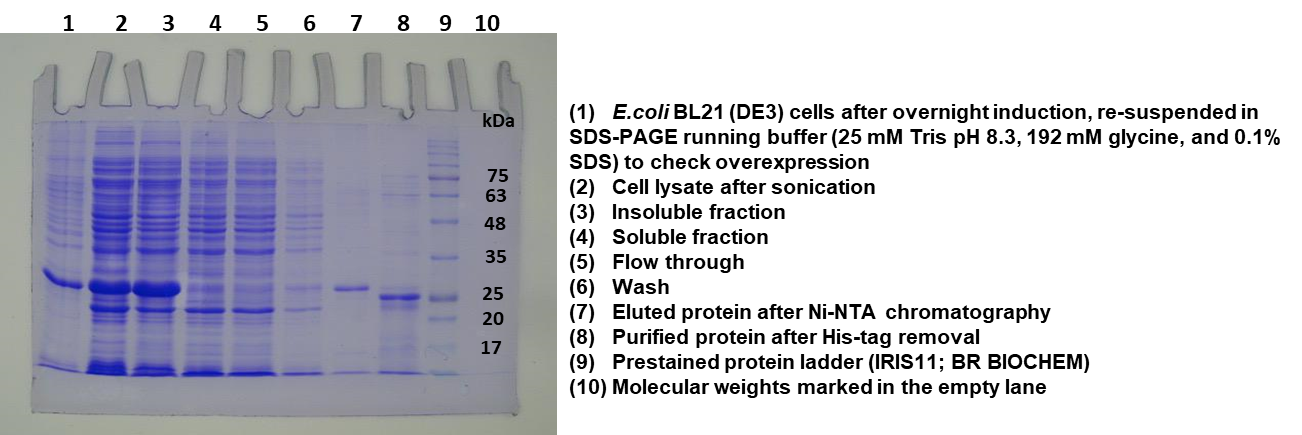 |
| --- |

Supplementary Figure 1: Purification of SARS-CoV-2 PLpro TR using Ni-NTA affinity chromatography. Lanes 1–8 represent samples collected at various steps during expression and purification, Lane 9 contains the molecular weight markers. Proteins were visualized on a 12% SDS-PAGE gel.
